# Supplementary material for: Comprehensive Metabolomic Fingerprinting Combined with Chemometrics Identifies Species- and Variety-Specific Variation of Medicinal Herbs: An Ocimum Study
Source: MDPI journal article supplement (doi:10.3390/metabo13010122), 2023-01-13
Supplement: s1 [file s1]

## Supplementary Material

(Figure S1-Figure S13; Table S1-Table S4)

**A**

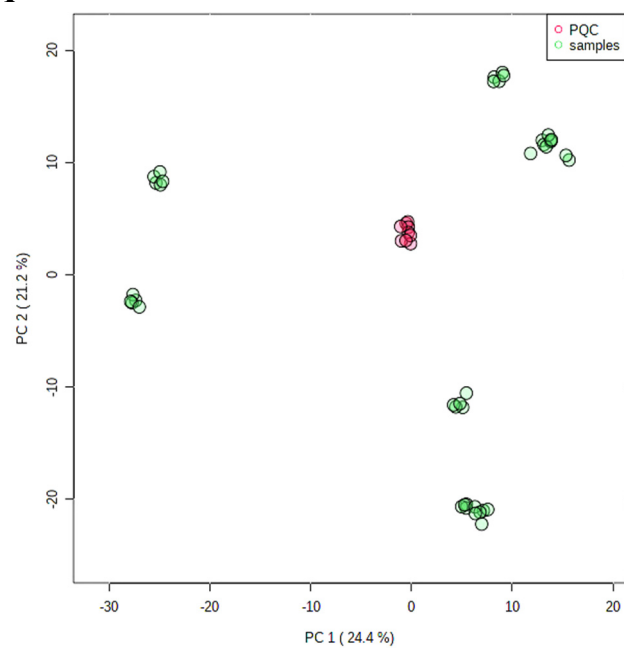

**B**

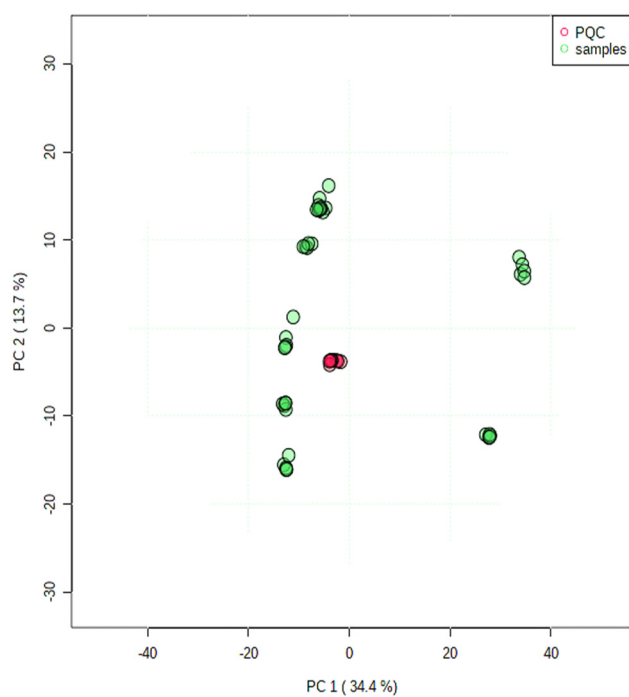

Figure S1: QC plots for A) LC-MS neg mode B) LC-MS pos mode

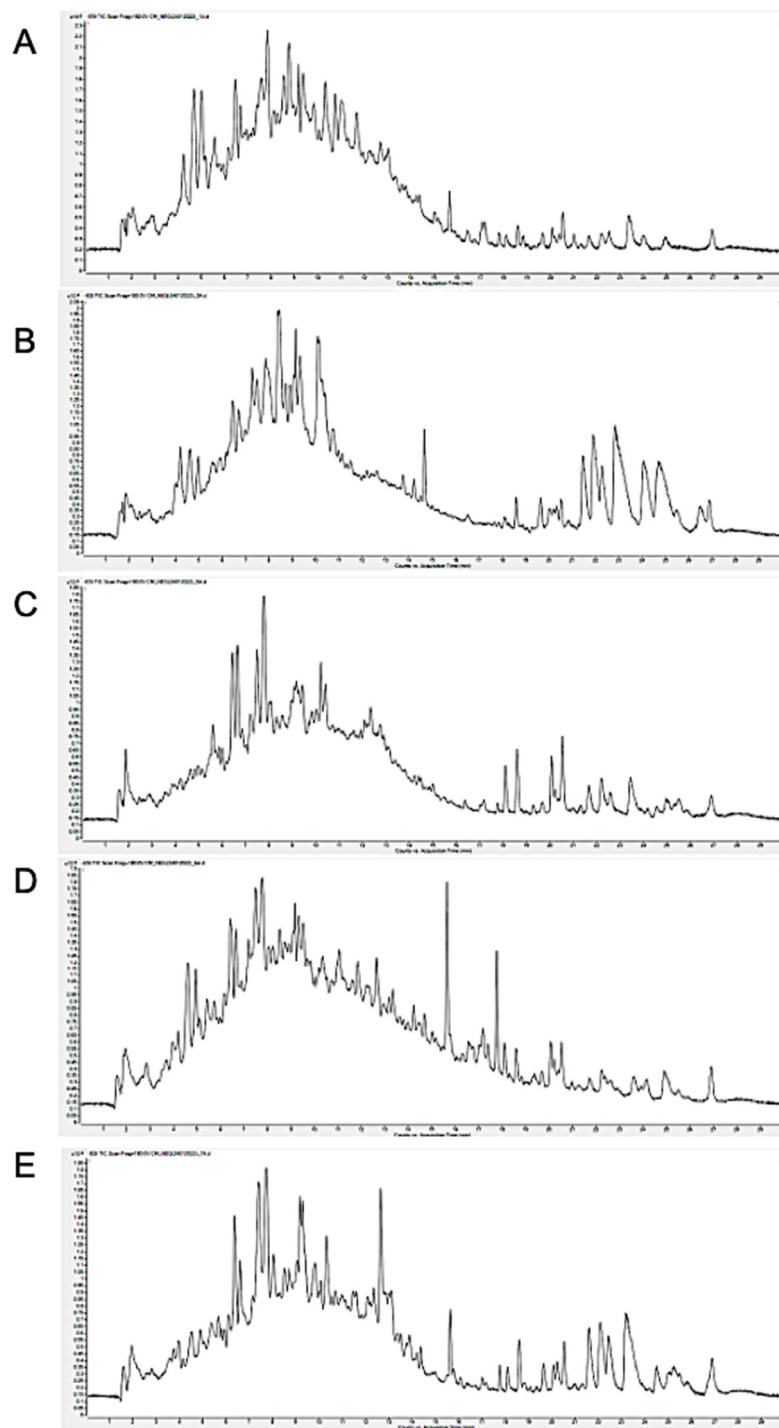

**Figure S2:** TIC metabolites profile LC-MS neg mode.

- A *Ocimum basilicum*
- B *Ocimum sanctum*
- C *Ocimum kilimandscharicum*
- D *Ocimum africanum*
- E Hybrid Tulsi

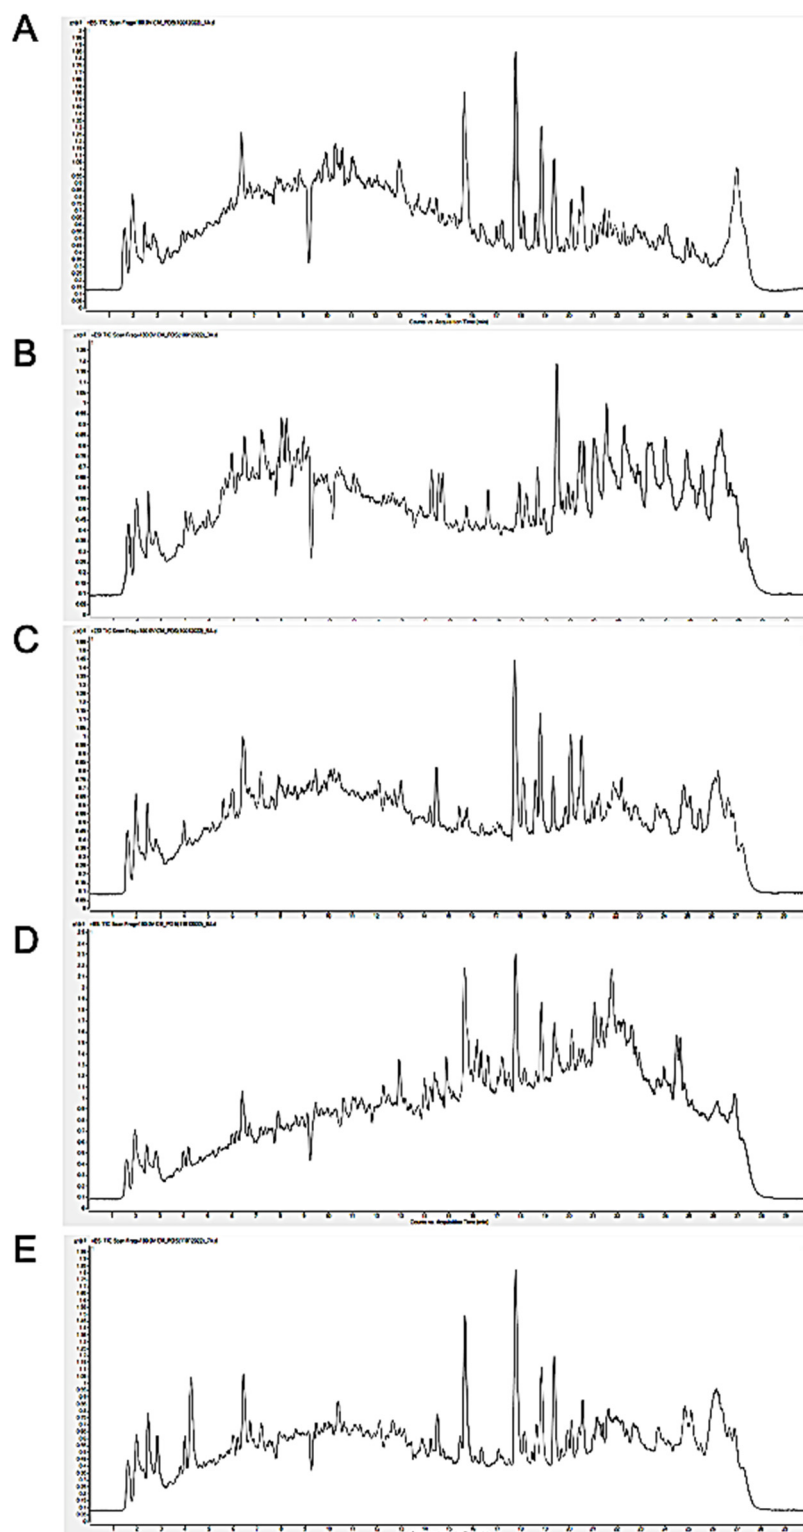

Figure S3: TIC metabolites profile LC-MS pos mode.

**A**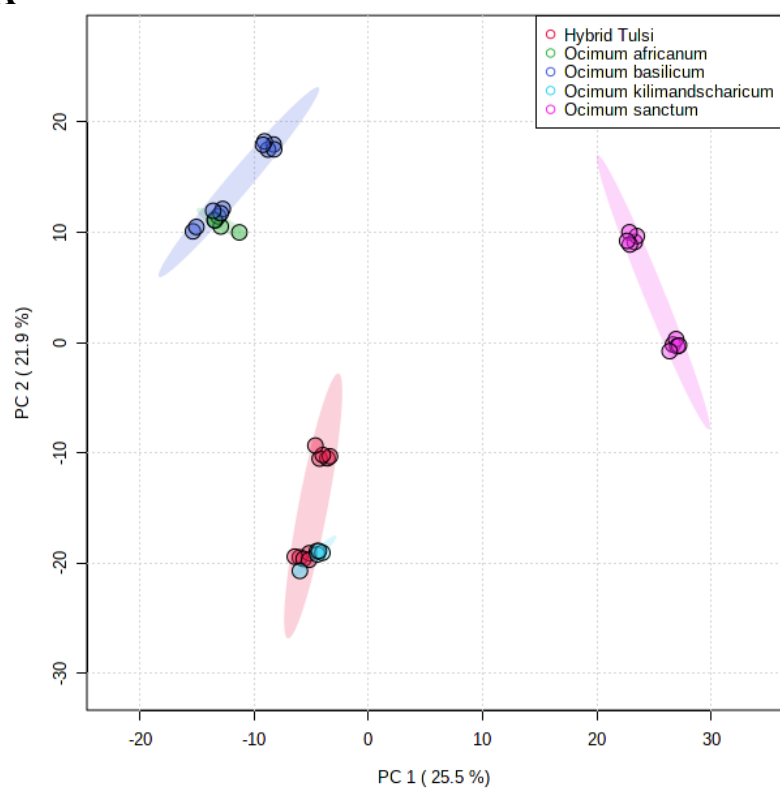**B**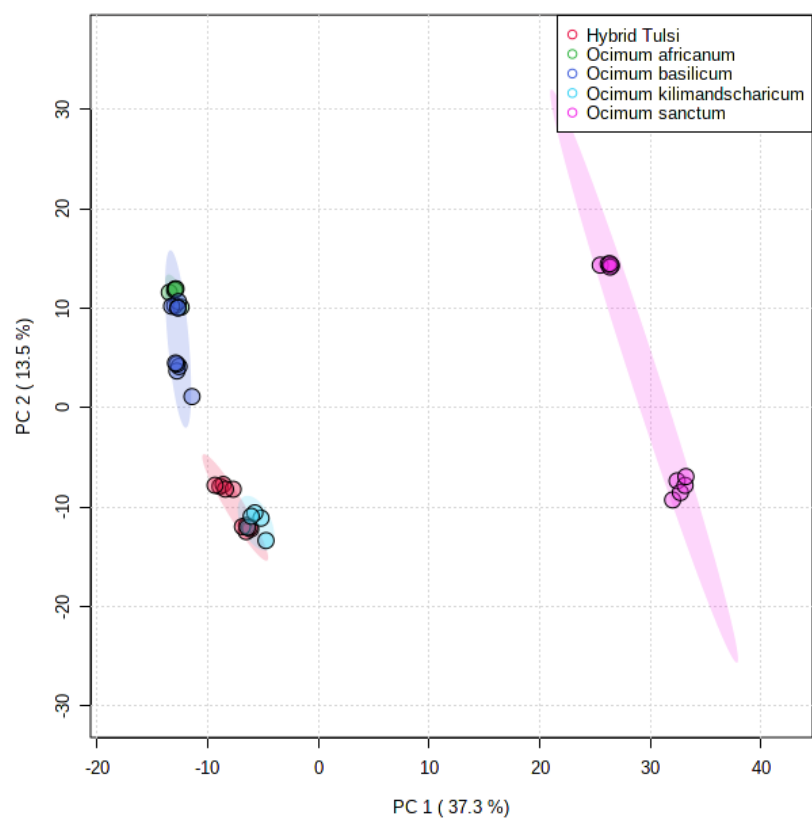

**Figure S4:** PCA plots for A) LC-MS neg mode B) LC-MS pos mode

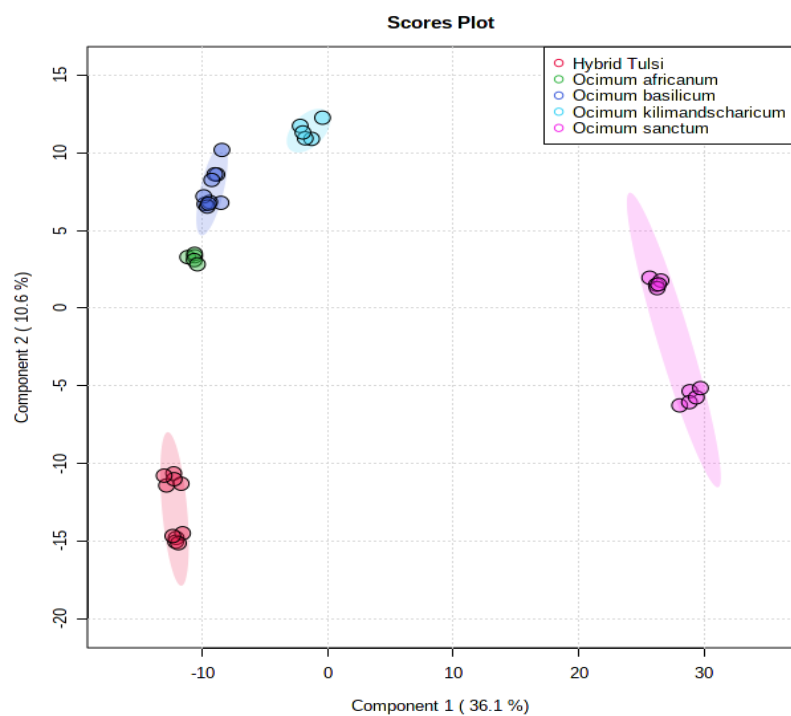

Figure S5: PLS-DA scores plot for five different species of *Ocimum* samples acquired in LC-MS positive ionization mode.

A)

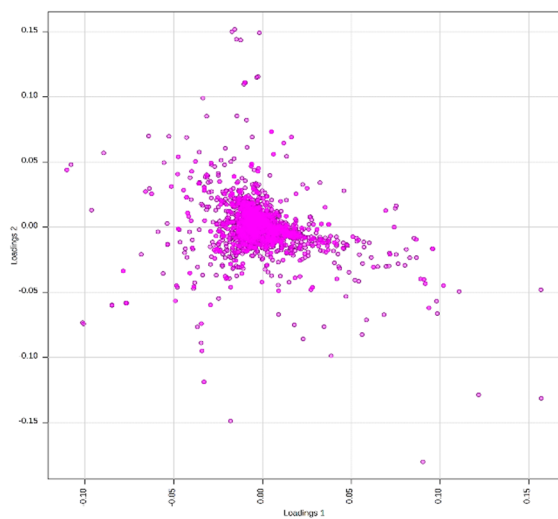

B)

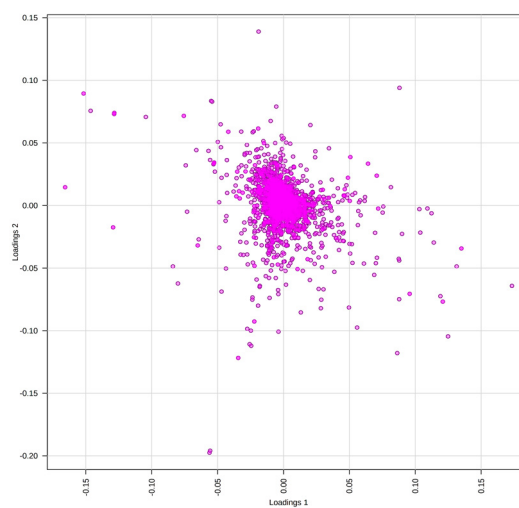

Figure S6: PLS-DA loadings plot for the *Ocimum* species acquired in A) LC-MS ESI (-) mode and B) LC-MS ESI (+) mode respectively.

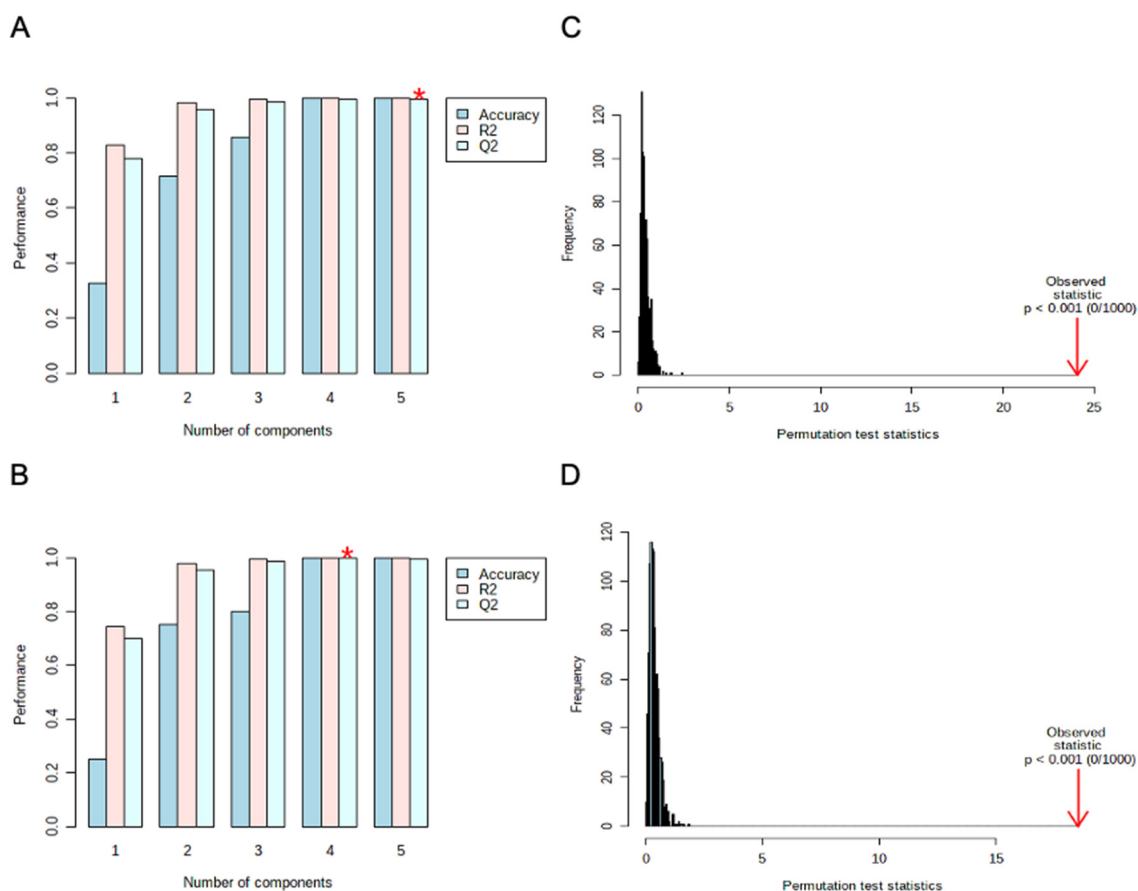

**Figure S7:** PLS-DA Validation results for *Ocimum* samples analysed by LC-MS A) & B) Multivariate analysis using PLS-DA cross validation for LC-MS based metabolite profile acquired in ESI (-) mode and ESI (+) mode respectively. Bar plots showing the three performance measures (prediction accuracy,  $R^2$  and  $Q^2$ ) using different number of components. The red '\*' indicates the best values of the currently selected measures ( $Q^2$ ). C) & D) Statistical validation of the PLS-DA by permutation analysis using 1000 different model permutations. The goodness of fit and predictive capability of the original class assignments is much higher compared to ratios based on the permutation class assignments ( $P < 0.001$ ).

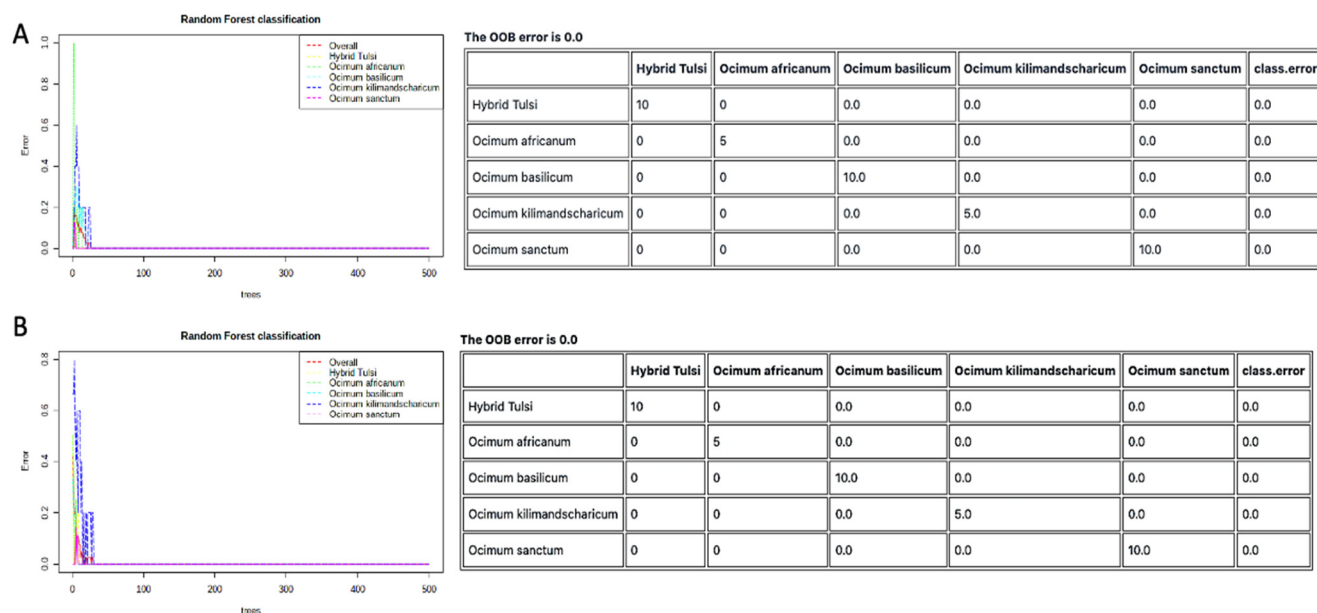

**Figure S8:** Random Forest classification of models *Ocimum* samples A) Metabolite profile acquired by LC-MS ESI (-) mode, B) Metabolite profile acquired by LC-MS ESI (+) mode

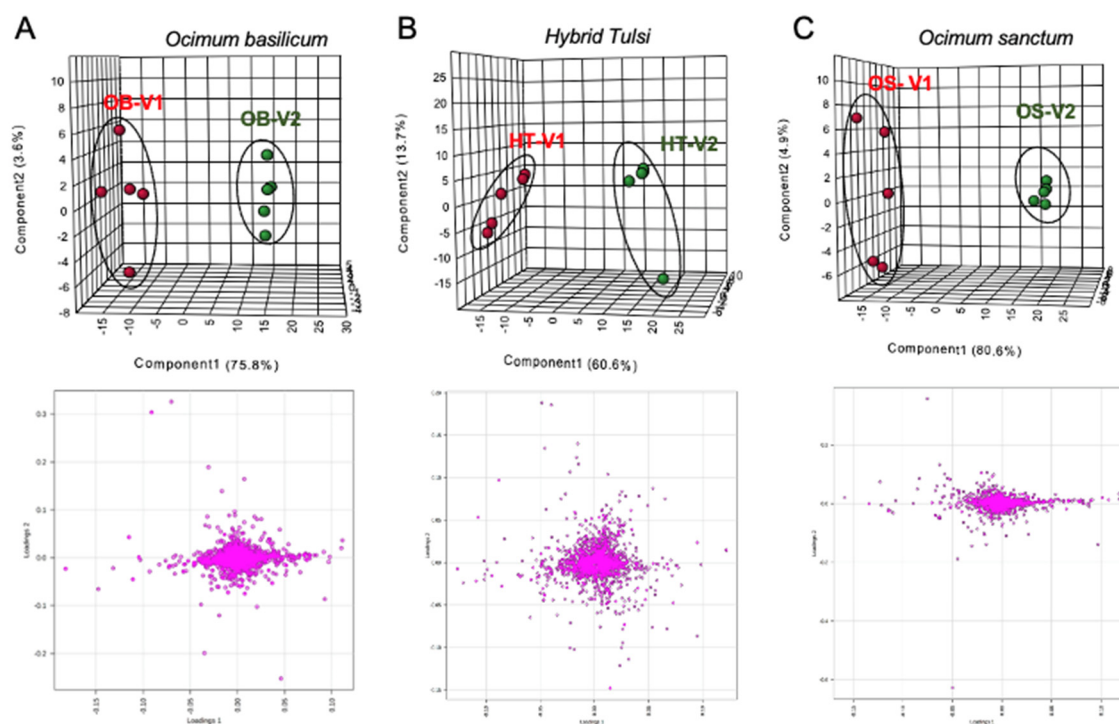

**Figure S9:** Variety specific variation of *Ocimum* samples from A) *Ocimum basilicum* B) Hybrid Tulsi C) *Ocimum sanctum*



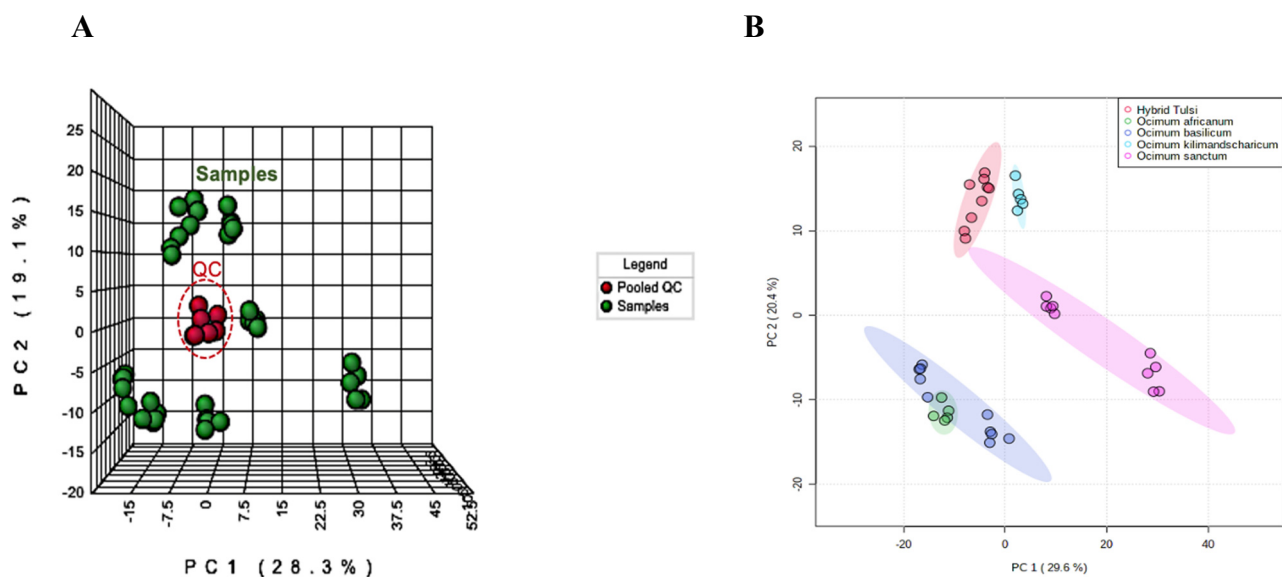

**Figure S10:** A) PCA plot for GC-MS based metabolite profile of Quality control samples and *Ocimum* samples. B) PCA plot for *Ocimum* species samples acquired through GC-MS based metabolite profiling. PC1 explains 29.6% variation and PC2 explains 20.4% variation.

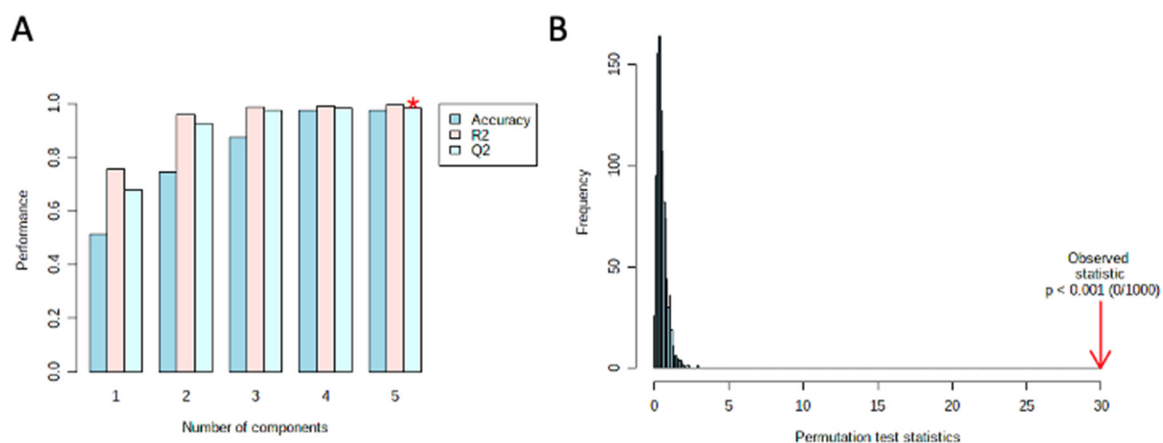

**Figure S11:** A) Multivariate analysis using PLS-DA cross validation. Bar plots showing the performance measures, prediction accuracy,  $R^2$  and  $Q^2$ , using different number of components. The red '\*' indicates the best values of the currently selected measures ( $Q^2$ ). B) Statistical validation of the PLS-DA by permutation analysis using 1000 different model permutations. The goodness of fit and predictive capability of the original class assignments is much higher compared to ratios based on the permutation class assignments ( $P < 0.001$ ).

|                          | Hybrid Tulsi | Ocimum africanum | Ocimum basilicum | Ocimum kilimandscharicum | Ocimum sanctum | class.error |
|--------------------------|--------------|------------------|------------------|--------------------------|----------------|-------------|
| Hybrid Tulsi             | 9            | 0                | 0.0              | 0.0                      | 0.0            | 0.0         |
| Ocimum africanum         | 0            | 5                | 0.0              | 0.0                      | 0.0            | 0.0         |
| Ocimum basilicum         | 0            | 0                | 10.0             | 0.0                      | 0.0            | 0.0         |
| Ocimum kilimandscharicum | 0            | 0                | 0.0              | 5.0                      | 0.0            | 0.0         |
| Ocimum sanctum           | 0            | 0                | 0.0              | 0.0                      | 10.0           | 0.0         |

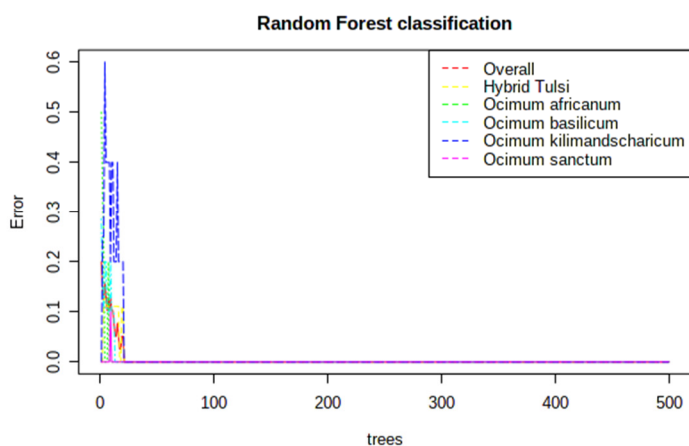

**Figure S12:** Random Forest classification of models for *Ocimum* samples acquired using GC-MS.

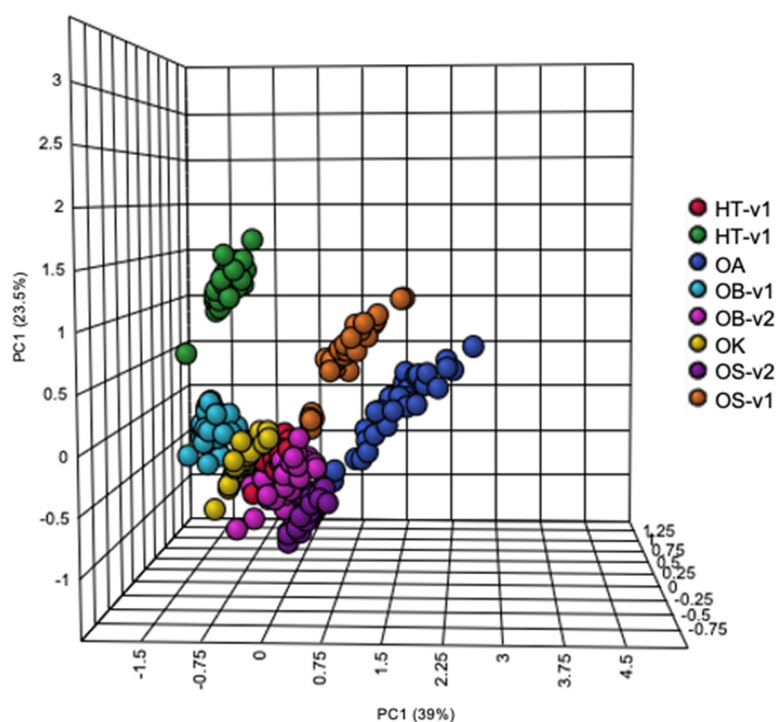

**Figure S13:** PCA analysis of FT-NIR spectral profiles of *Ocimum* samples from different species and varieties.

**Table S1:** Ocimum species and the varieties used in the present study.

| S.NO | Ocimum species                  | Variety                         |
|------|---------------------------------|---------------------------------|
| 1    | <i>Ocimum basilicum</i>         | OB-v1                           |
|      |                                 | OB-v2                           |
| 2    | <i>Ocimum Sanctum</i>           | OS-v1                           |
|      |                                 | OS-v2                           |
| 3    | <i>Ocimum africanum</i>         | <i>Ocimum africanum</i>         |
| 4    | <i>Ocimum</i> Hybrid Tulsi      | HT-v1                           |
|      |                                 | HT-v2                           |
| 5    | <i>Ocimum kilimandscharicum</i> | <i>Ocimum kilimandscharicum</i> |

Province India, CSIR-CIMAP Lucknow

**Table S2:** Discriminatory markers based on LC-MS/MS for *Ocimum* samples from different species.

| Metabolite                         | Formulae    | VIP   | Ionization mode | Adduct | ppm   | m/z      | RT     | Pubchem ID | P value    | FDR        | MS/MS                                                                        |
|------------------------------------|-------------|-------|-----------------|--------|-------|----------|--------|------------|------------|------------|------------------------------------------------------------------------------|
| Cpd 106: Kaempferol-3-O-rutinoside | C27 H30 O15 | 2.733 | Pos             | M+H    | 4.28  | 595.1631 | 8.144  | 5318767    | 1.2004E-15 | 1.6066E-14 | 287.0550, 449.10785, 269.0450, 431.0978, 449.1084, 147.0657                  |
| 20Cpd 19: Apigenin-7-O-glucuronide | C21 H18 O11 | 3.865 | Pos             | M+H    | -0.68 | 447.0923 | 8.922  | 12912214   | 4.7188E-36 | 8.2107E-34 | 271.0602, 253.0501, 241.0501, 177.0399                                       |
| Cpd 88: Gardenin B                 | C19 H18 O7  | 2.579 | Pos             | M+H    | 0.48  | 359.1123 | 18.879 | 96539      | 2.1599E-20 | 6.2636E-19 | 344.0890, 316.0941                                                           |
| Cpd 103: Kaempferol                | C15 H10 O6  | 2.070 | Pos             | M+H    | -0.06 | 287.0549 | 10.882 | 5280863    | 1.7363E-20 | 6.0423E-19 | 269.0450, 165.05463, 257.0450, 245.0450                                      |
| Cpd 55: Cirsilineol                | C18 H16 O7  | 1.410 | Pos             | M+H    | 0.14  | 345.0969 | 9.462  | 162464     | 8.6581E-6  | 2.1833E-5  | 330.0734, 315.0869, 329.0661, 313.0712, 285.0763                             |
| Cpd 17: Apigenin                   | C15 H10 O5  | 1.598 | Pos             | M+H    | 0.64  | 271.0599 | 12.154 | 5280443    | 1.3656E-5  | 3.2109E-5  | 253.0501, 241.0501, 229.0501                                                 |
| Cpd 158: Rosmarinic acid           | C18 H16 O8  | 2.036 | Pos             | M+H    | 0.27  | 361.0916 | 13.022 | 5281792    | 1.3185E-4  | 2.5211E-4  | 163.03897, 181.04953, 145.02841, 117.03349,                                  |
| Cpd 142: Carvacrol                 | C10 H14 O   | 3.272 | Pos             | M+H    | 0.45  | 151.1117 | 8.944  | 10364      | 3.4225E-16 | 4.9626E-15 | 91.0542, 93.0699, 107.0491, 43.0542, 81.0699, 79.0542                        |
| Cpd 166: Salvianolic acid C        | C26 H20 O10 | 4.857 | Pos             | M+H    | 0.17  | 493.1128 | 12.594 | 13991590   | 3.6157E-8  | 1.6131E-7  | 295.0601, 267.0652, 465.1180, 475.1024, 447.1074, 385.0918                   |
| Cpd 33: Caftaric acid              | C13 H12 O9  | 2.170 | Neg             | M-H    | 2.36  | 311.04   | 4.637  | 6440397    | 1.3425E-13 | 9.4561E-13 | 135.0452, 103.0037, 161.0244, 133.0295, 105.0193,                            |
| Cpd 151: Protocatechuic acid       | C7 H6 O4    | 2.301 | Pos             | M+H    | 2.67  | 155.0339 | 4.101  | 72         | 2.4537E-22 | 1.0674E-20 | 137.0239, 109.0290, 111.0446, 125.0239, 107.0133, 125.0239, 79.0184          |
| Cpd 78: Genkwanin                  | C16 H12 O5  | 1.153 | Neg             | M-H    | 2.04  | 283.061  | 15.506 | 5281617    | 1.4665E-10 | 5.9395E-10 | 242.05736, 270.05228, 167.03389                                              |
| Cpd 69: confieraldehyde            | C10 H10 O3  | 1.704 | Pos             | M+H    | -0.85 | 179.0701 | 20.96  | 5280536    | 5.3268E-6  | 1.4043E-5  | 161.0603, 149.0663, 55.0184, 147.0446, 137.0603, 43.0184, 131.0497, 125.0603 |

**Table S3:** Discriminatory markers for *Ocimum* samples from different species.

| Compound                                                           | Rt    | Formulae     | VIP   | P-Value    | FDR        | m/z                 | PubChemID |
|--------------------------------------------------------------------|-------|--------------|-------|------------|------------|---------------------|-----------|
| Malic acid, 3TMS                                                   | 12.72 | C13H30O5Si3  | 1.132 | 9.6887E-10 | 4.687E-9   | 73,147,233,245,133  | 525       |
| D-Ribose, 4TMS                                                     | 15.24 | C17H42O5Si4  | 2.378 | 6.7304E-20 | 3.8094E-18 | 73,217,204,191,147  | 10975657  |
| D-(-)-Fructose,<br>pentakis(trimethylsilyl<br>) ether, methyloxime | 16.43 | C22H55NO6Si5 | 2.481 | 2.4845E-8  | 9.6317E-8  | 73,103,217,147,307  | 5984      |
| Citramalic acid, 3TMS                                              | 12.59 | C14H32O5Si3  | 2.368 | 3.6699E-10 | 1.8546E-9  | 73,247,147,259,115  | 1081      |
| Quinic acid (5TMS)                                                 | 16.26 | C22H52O6Si5  | 3.515 | 3.4102E-25 | 6.4339E-23 | 73,345,147,255,191  | 345824    |
| Eugenol TMS                                                        | 12.47 | C13H20O2Si   | 2.869 | 2.0791E-7  | 6.8416E-7  | 206,236,205,207,221 | 3314      |
| Gulonic acid,<br>.gamma.-lactone,<br>4TMS derivavative             | 15.6  | C18H42O6Si4  | 1.953 | 5.4385E-12 | 3.6214E-11 | 73,147,217,103,204  | 165105    |
| Quercetin, 5TMS                                                    | 24.96 | C30H50O7Si5  | 3.068 | 3.6039E-12 | 2.5183E-11 | 647,73,648,649,559  | 5280343   |
| Shikimic acid, 4TMS                                                | 15.68 | C19H42O5Si4  | 1.946 | 3.2173E-12 | 2.3051E-11 | 73,204,147,205,206  | 8742      |

**Table S4:** Classification results for test samples with k-Nearest Neighbors[illegible]

|        |       |       |       |       |       |       |       |       |       |
|--------|-------|-------|-------|-------|-------|-------|-------|-------|-------|
|        | 0.000 | 0.000 | 0.000 | 0.000 | 0.000 | 0.000 | 0.000 | 1.000 | 0.114 |
|        | 0.000 | 0.000 | 0.000 | 0.000 | 0.000 | 0.000 | 0.000 | 1.000 |       |
|        | 0.000 | 0.000 | 0.000 | 0.000 | 0.000 | 0.000 | 0.000 | 0.114 |       |
| Column | 12    | 14    | 13    | 13    | 13    | 14    | 14    | 12    | 105   |
| Total  | 0.114 | 0.133 | 0.124 | 0.124 | 0.124 | 0.133 | 0.133 | 0.114 |       |

Total number of samples = 280

Total number of Training samples set = 175; Test samples set = 105

- i. 12 out of 35 observations were accurately predicted as HT-V1 constitutes of 11.4%
- ii. 14 out of 35 observations were accurately predicted as HT-V2 constitutes of 13.3%
- iii. 13 out of 35 observations were accurately predicted as OA constitute of 12.4%
- iv. 13 out of 35 observations were accurately predicted as OB-V1 constitute of 12.4%
- v. 11 out of 35 observations were accurately predicted as OB-V2 constitute of 12.4%
- vi. 11 out of 35 observations were accurately predicted as OK constitute of 13.3%
- vii. 11 out of 35 observations were accurately predicted as OS-V2 constitute of 13.3%
- viii. 11 out of 35 observations were accurately predicted as OS-V1 constitute of 11.4%

There are no cases of false positives and false negatives.

Total accuracy of model = 100%
